# Supplementary material
Source: publisher figshare collection journal article supplement (https://tandf.figshare.com/articles/dataset/_/4213413)
Supplement: Supplementary file 1 [file 1]

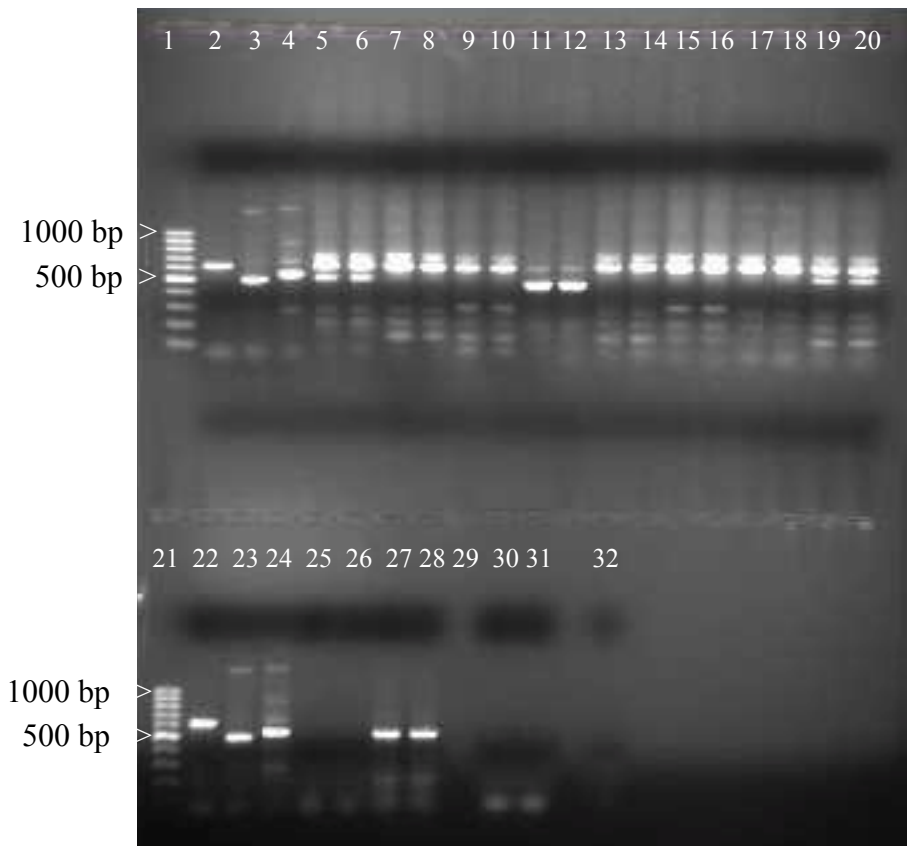

Supplementary Figure 1. An example of gel electrophoresis of 16S rRNA PCR products using 8F and 519R primers with DNA extracted from jellyfish material. 1, 21: 100 bp size marker; 2, 22: 18S control; 3, 4, 23, 24: 16S control; 5-20: *Nemopsis bachei*; 25-31: *Aurelia aurita*; 32: negative (no template control).
